# Supplementary material
Source: PubMed Central journal article supplement (PMC8277685)
Supplement: NIHMS1695100-supplement-1.pdf [file NIHMS1695100-supplement-1.pdf]

## Supplemental Figure 1

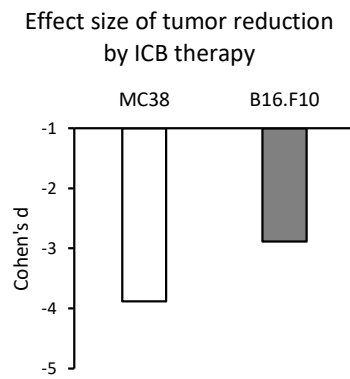

**Supplemental Figure 1. Effect size of tumor reduction by Immune checkpoint blockade therapy.** MC38 or B16.F10 inoculated mice were treated with either Isotype control Ab, anti-PD-L1 Ab, or anti-PD-L1 Ab + anti-CTLA-4 Ab on days 9, 12, and 15 post tumor inoculation (n = 5 per group). Tumor size of the control group and ICB group on day 17 were used for calculation of Cohen's d.

## Supplemental Figure 2

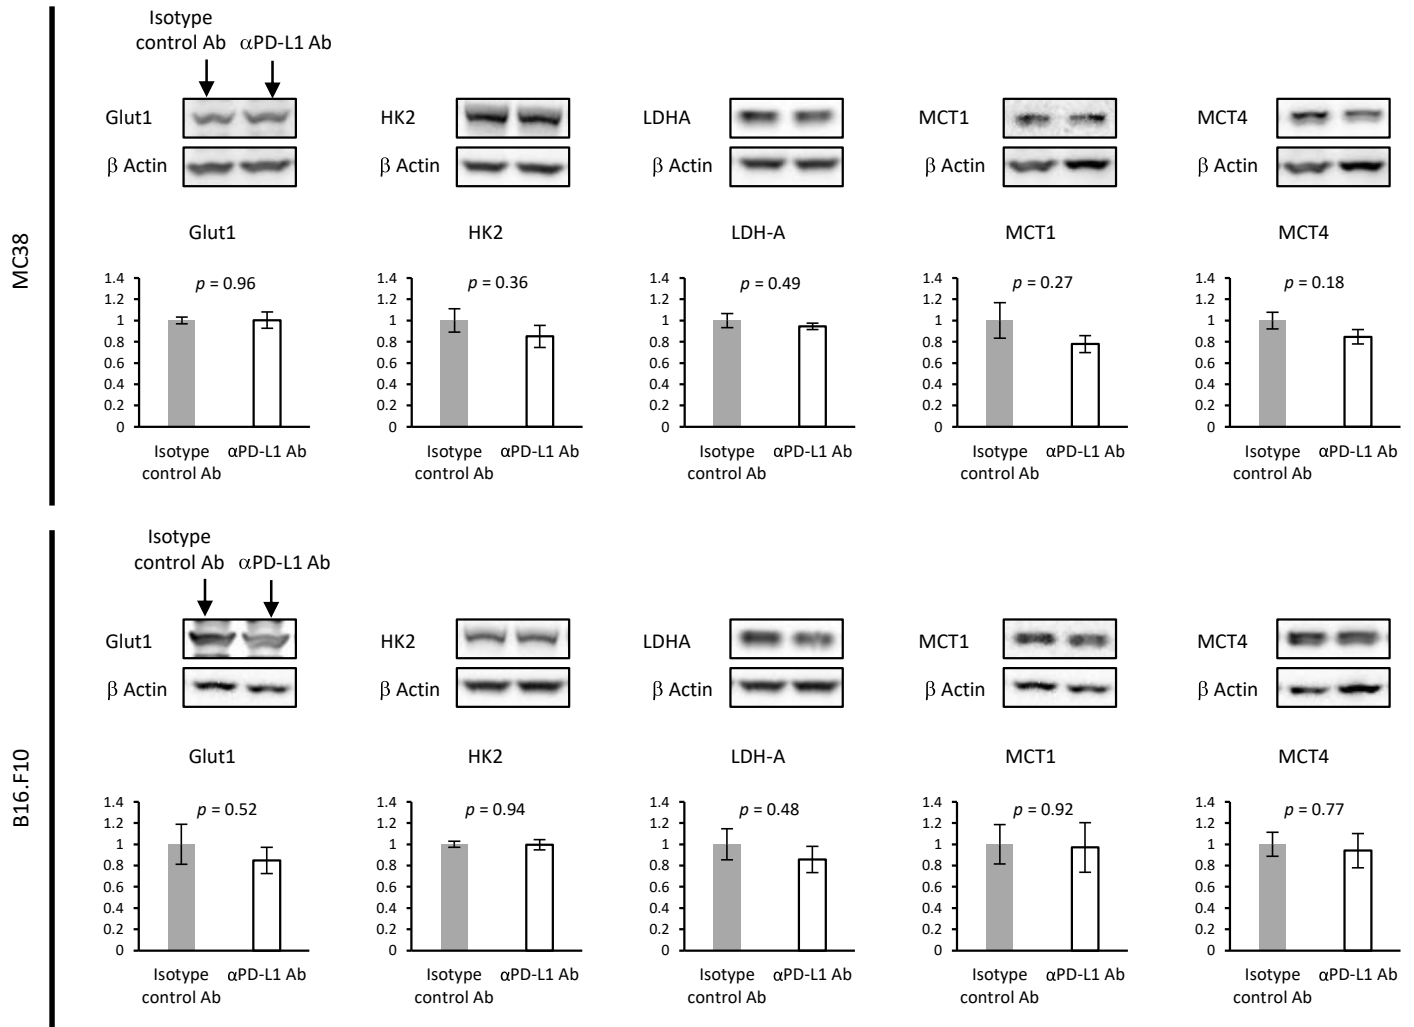

**Supplemental Figure 2. Western blot analysis for glycolytic enzymes and transporters (Glut1, HK2, LDHA, MCT1, and MCT4) on tumor cells in vitro.** MC38 and B16.F10 tumor cells pre-treated with IFN- $\gamma$  for 24 h followed by anti-PD-L1 Ab or isotype control Ab for 24 h were collected and processed. Bar plot shows the quantification of protein bands. Data are shown as mean  $\pm$  SE. The mean of the control group is set as 1 (n = 4 per group). Statistical significance between groups was determined by Student's t test.

### Supplemental Figure 3

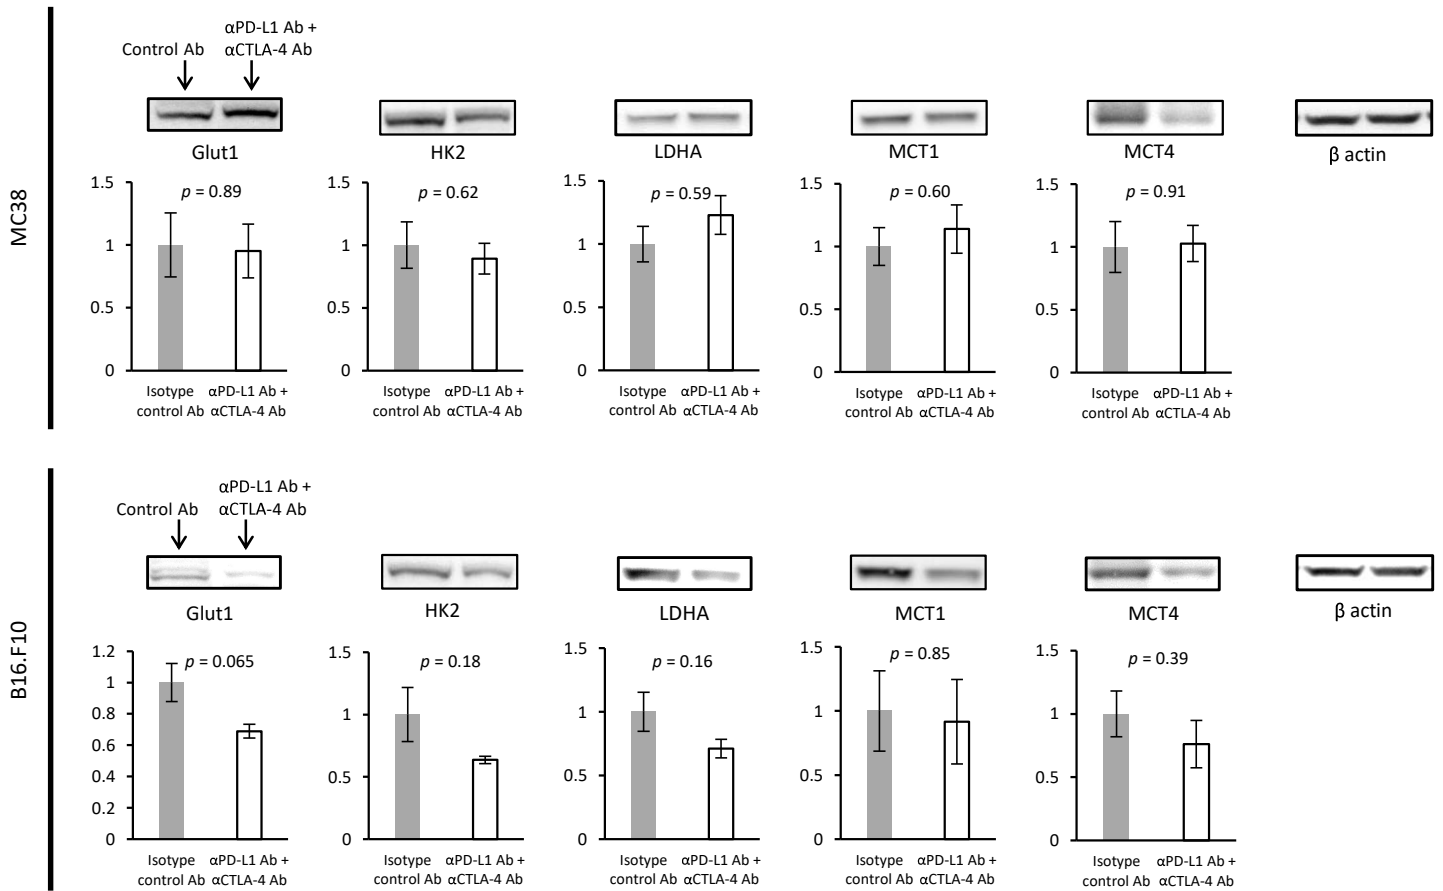

**Supplemental Figure 3. Western blot analysis for glycolytic enzymes and transporters (Glut1, HK2, LDHA, MCT1, and MCT4) on in vivo ICB treated tumor.** MC38 or B16.F10 tumor bearing mice were treated with isotype control Ab or anti-PD-L1 Ab + anti-CTLA-4 Ab on day 9 and 12. Tumors were harvested and processed on day 13. Bar plot shows the quantification of protein bands. Data are shown as mean  $\pm$  SE. The mean of the control group is set as 1 (n = 5 per group). Statistical significance between groups was determined by Student's t test.

## Supplemental Figure 4

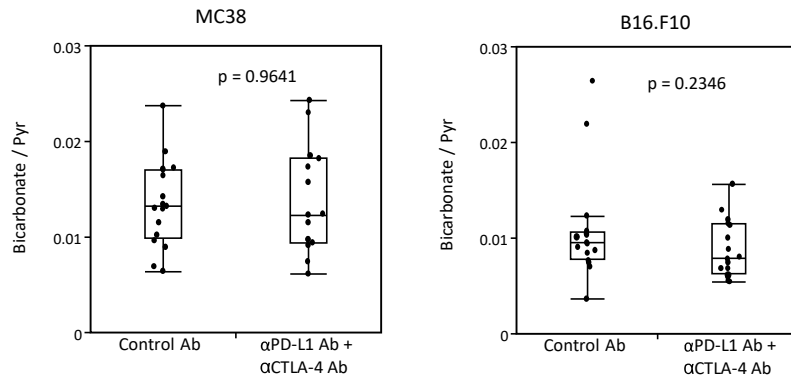

### Supplemental Figure 4. Bicarbonate/Pyr ratio examined with hyperpolarized $^{13}\text{C}$ MRI using $[1-^{13}\text{C}]$ pyruvate in Figure 3.

MRI of hyperpolarized  $^{13}\text{C}$  pyruvate metabolism in two murine tumor models. Tumor bearing mice treated with isotype control Ab or anti-PD-L1 Ab + anti-CTLA-4 Ab were scanned after 2nd injection of antibodies (MC38;  $n = 23$ ,  $n = 16$  each group, B16.F10;  $n = 17$ ,  $n = 16$  each group). (A) Bicarbonate to Pyruvate ratio of MC38 or B16.F10 sorted by treatment. Data are shown as box-and-whisker plot (median, maximum, minimum, first quartile, and third quartile); individual values are shown. Statistical significance between groups was determined by Student's t test.

Supplemental Figure 5

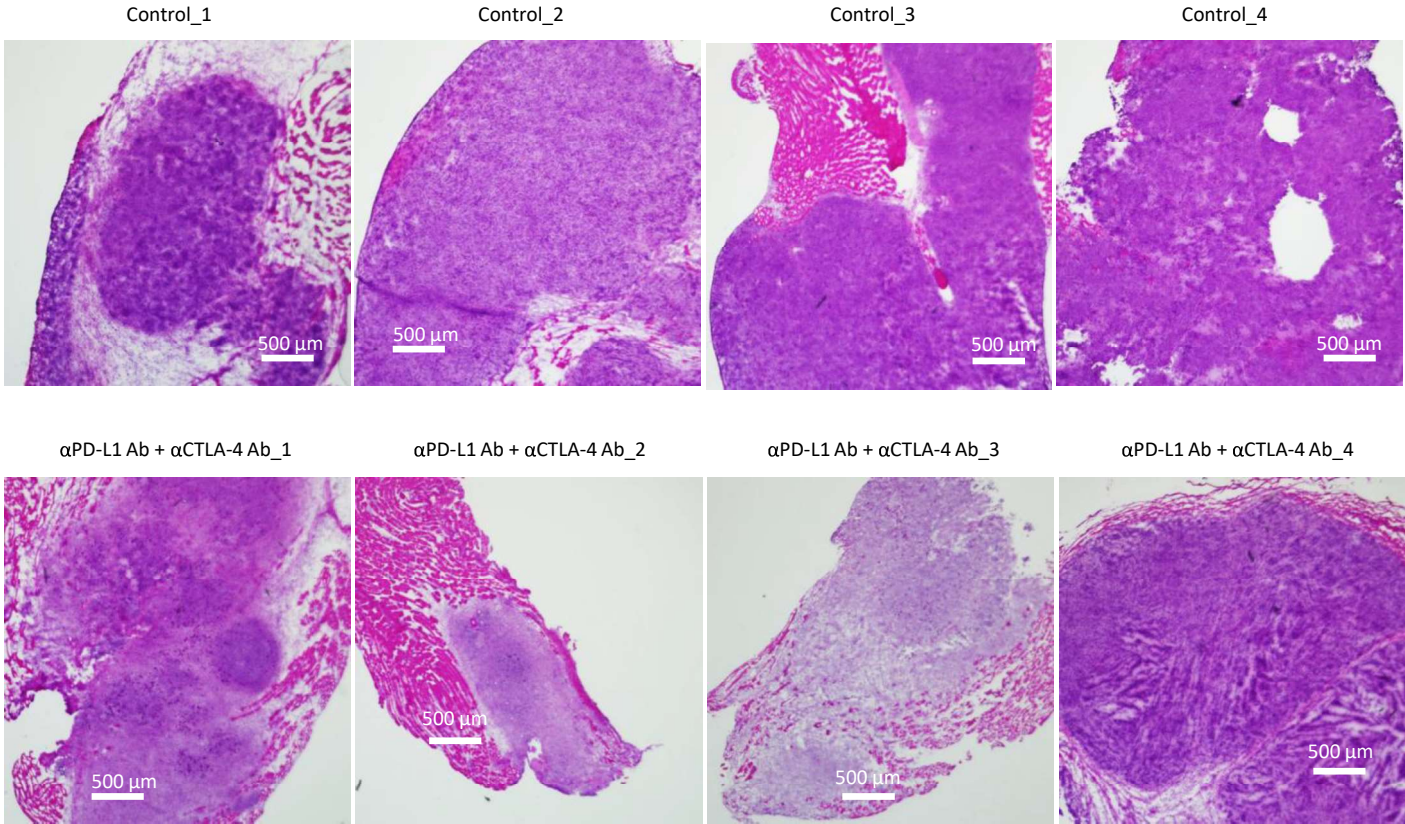

**Supplemental Figure 5. Hematoxylin and eosin staining (HE) of MC38 tumors.** MC38 tumor bearing mice were treated with each Ab on day 9 and 12. Tumors were harvested on day 13 (scale bar = 500 μm).

## Supplemental Figure 6

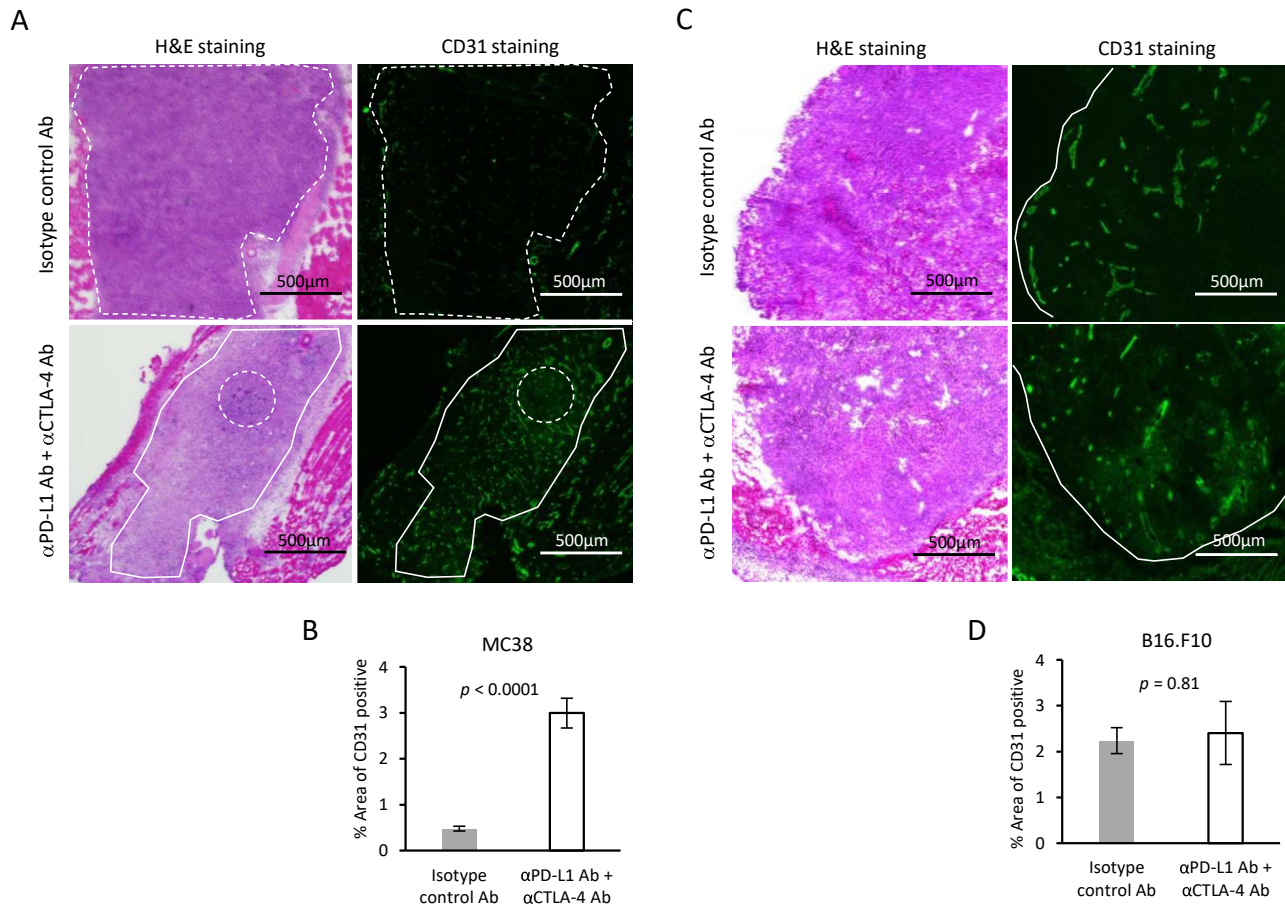

**Supplemental Figure 6. Histological assessment of CD31 staining.** (A and C) Immunofluorescence staining of CD31 in MC38 (A) and B16.F10 (C) tumor. MC38 or B16.F10 tumor bearing mice were treated with each Ab on day 9 and 12. Tumors were harvested on day 13 (MC38; n = 4 per group, B16.F10; n = 5 per group). (A and C) Representative HE and CD31 staining of same section in MC38 and B16.F10 tumor (scale bar = 500  $\mu$ m). (B and D) Quantification of CD31 positive area. Data are shown as mean  $\pm$  SE. Statistical significance between groups was determined by Student's *t* test for B and D.

**Supplemental Table 1A.** Multi-regression analysis of the treatment group (isotype control Ab or anti-PD-L1 Ab + anti-CTLA-4 Ab) in MC38 tumors examined with <sup>13</sup>C pyruvate MRI.

| Coefficients                  | Estimate | Std. Error | t value | p value |
|-------------------------------|----------|------------|---------|---------|
| (Intercept)                   | -2.18    | 1.46       | 2.22    | 0.136   |
| Tumor size (mm <sup>3</sup> ) | 0.00127  | 0.00334    | 0.15    | 0.703   |
| Lac / Pyr                     | 2.71     | 1.79       | 2.28    | 0.131   |

**Supplemental Table 1B.** Multi-regression analysis of the treatment group (isotype control Ab or anti-PD-L1 Ab + anti-CTLA-4 Ab) in B16.F10 tumors examined with <sup>13</sup>C pyruvate MRI.

| Coefficients                  | Estimate | Std. Error | t value | p value  |
|-------------------------------|----------|------------|---------|----------|
| (Intercept)                   | -4.94    | 2.14       | 5.30    | * 0.0213 |
| Tumor size (mm <sup>3</sup> ) | 0.00115  | 0.00437    | 0.07    | 0.793    |
| Lac / Pyr                     | 6.67     | 2.82       | 5.57    | * 0.0182 |

**Supplemental Table 1C.** Multi-regression analysis of the treatment group (isotype control Ab or anti-PD-L1 Ab + anti-CTLA-4 Ab) in MC38 tumors examined with <sup>13</sup>C fumarate MRI.

| Coefficients                  | Estimate | Std. Error | t value | p value  |
|-------------------------------|----------|------------|---------|----------|
| (Intercept)                   | 5.30     | 2.32       | 5.20    | * 0.0226 |
| Tumor size (mm <sup>3</sup> ) | -0.00098 | 0.0089     | 0.01    | 0.912    |
| Mal / Fum                     | -70      | 28.3       | 6.11    | * 0.0134 |

**Supplemental Table 1D.** Multi-regression analysis of the treatment group (isotype control Ab or anti-PD-L1 Ab + anti-CTLA-4 Ab) in B16.F10 tumors examined with <sup>13</sup>C fumarate MRI.

| Coefficients                  | Estimate | Std. Error | t value | p value |
|-------------------------------|----------|------------|---------|---------|
| (Intercept)                   | 3.35     | 2.23       | 2.25    | 0.133   |
| Tumor size (mm <sup>3</sup> ) | -0.00826 | 0.00627    | 1.74    | 0.188   |
| Mal / Fum                     | -17.3    | 21.8       | 0.63    | 0.429   |

**Supplemental Table 1E.** Multi-regression analysis of the treatment group (isotype control Ab or anti-PD-L1 Ab + anti-CTLA-4 Ab) in MC38 tumors examined with DCE-MRI.

| Coefficients                  | Estimate | Std. Error | t value | p value  |
|-------------------------------|----------|------------|---------|----------|
| (Intercept)                   | 7.28     | 2.85       | 6.53    | * 0.0106 |
| Tumor size (mm <sup>3</sup> ) | -0.0117  | 0.00589    | 3.96    | * 0.0466 |
| K <sub>trans</sub>            | -199     | 79.1       | 6.3     | * 0.0121 |

**Supplemental Table 1F.** Multi-regression analysis of the treatment group (isotype control Ab or anti-PD-L1 Ab + anti-CTLA-4 Ab) in B16.F10 tumors examined with DCE-MRI.

| Coefficients                  | Estimate | Std. Error | t value | p value |
|-------------------------------|----------|------------|---------|---------|
| (Intercept)                   | -1.29    | 1.55       | 0.7     | 0.403   |
| Tumor size (mm <sup>3</sup> ) | -12.2    | 14.6       | 0.7     | 0.404   |
| K <sub>trans</sub>            | 0.00546  | 0.00405    | 1.81    | 0.178   |

**Supplemental Table 2A.** Single-regression analysis of imaging biomarker vs survival in MC38 tumor.

| MC38                  | Lac/Pyr |       |       | Mal/Fum |       |           | K <sup>trans</sup> |       |          | Ve       |       |           |
|-----------------------|---------|-------|-------|---------|-------|-----------|--------------------|-------|----------|----------|-------|-----------|
|                       | Control | ICB   | Whole | Control | ICB   | Whole     | Control            | ICB   | Whole    | Control  | ICB   | Whole     |
| <i>p</i> value        | 0.093   | 0.345 | 0.059 | 0.243   | 0.13  | ** 0.0033 | 0.488              | 0.35  | * 0.0206 | * 0.0422 | 0.249 | ** 0.0046 |
| <i>R</i> <sup>2</sup> | 0.462   | 0.179 | 0.266 | 0.188   | 0.339 | 0.449     | 0.127              | 0.175 | 0.399    | 0.533    | 0.254 | 0.533     |

**Supplemental Table 2B.** Single-regression analysis of imaging biomarker vs survival in B16.F10 tumor.

| B16.F10               | Lac/Pyr |          |           | Mal/Fum |          |       | K <sup>trans</sup> |          |           | Ve      |          |            |
|-----------------------|---------|----------|-----------|---------|----------|-------|--------------------|----------|-----------|---------|----------|------------|
|                       | Control | ICB      | Whole     | Control | ICB      | Whole | Control            | ICB      | Whole     | Control | ICB      | Whole      |
| <i>p</i> value        | 0.246   | * 0.0258 | ** 0.0023 | 0.533   | 0.966    | 0.279 | 0.526              | * 0.0238 | ** 0.0017 | 0.069   | * 0.0038 | ***<0.0001 |
| <i>R</i> <sup>2</sup> | 0.186   | 0.591    | 0.473     | 0.0824  | 0.000502 | 0.105 | 0.107              | 0.759    | 0.641     | 0.604   | 0.901    | 0.9        |
